# Supplementary material for: Electrochemical sensor based on the Mn3O4/CeO2nanocomposite with abundant oxygen vacancies for highly sensitive detection of hydrogen peroxide released from living cells
Source: Royal Society of Chemistry journal article supplement (doi:10.1039/d1ay00085c), 2021-01-01
Supplement: d1ay00085c1.pdf [file d1ay00085c1.pdf]

## Supplementary information

# Electrochemical sensor based on the $\text{Mn}_3\text{O}_4/\text{CeO}_2$ nanocomposite with abundant oxygen vacancies for highly sensitive detection of hydrogen peroxide released from living cells

Yalin Wu<sup>1</sup>, Liping Lu<sup>1\*</sup>, Zhihui Yu<sup>1</sup>, Xiayan Wang<sup>2\*</sup>

<sup>1</sup>Key Laboratory of Beijing on Regional Air Pollution Control, Beijing University of Technology, Beijing 100124, China; <sup>2</sup>Center of Excellence for Environmental Safety and Biological Effects,

Department of Chemistry and Biology, Beijing University of Technology, Beijing 100124, China

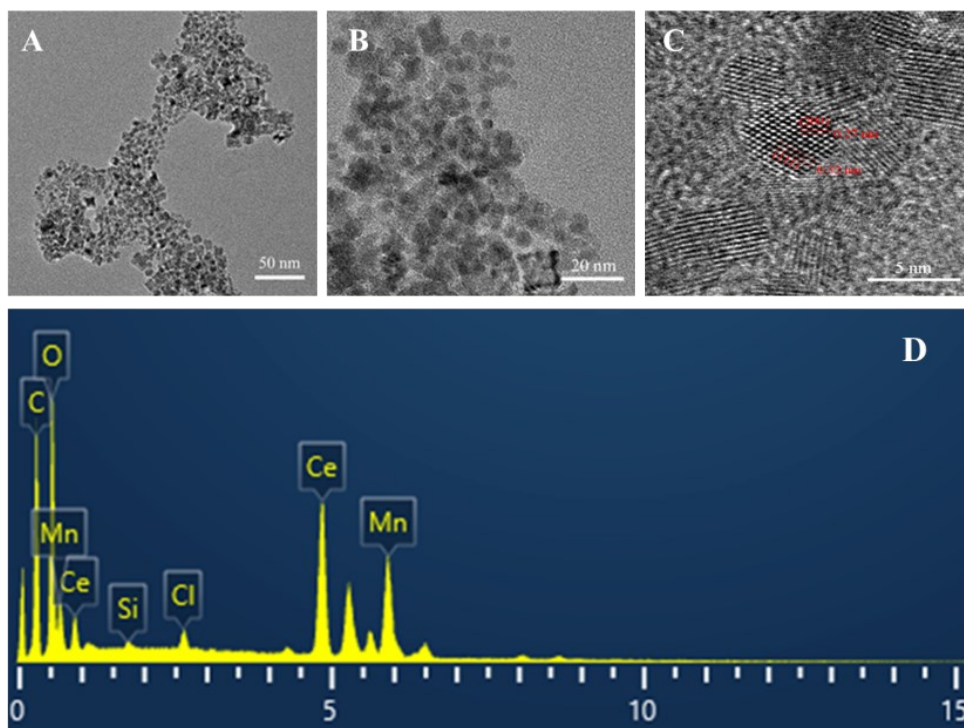

**Fig. S1.** The (A-C) HR-TEM images and (D) EDS of the Mn<sub>3</sub>O<sub>4</sub>/CeO<sub>2</sub> nanocomposites.

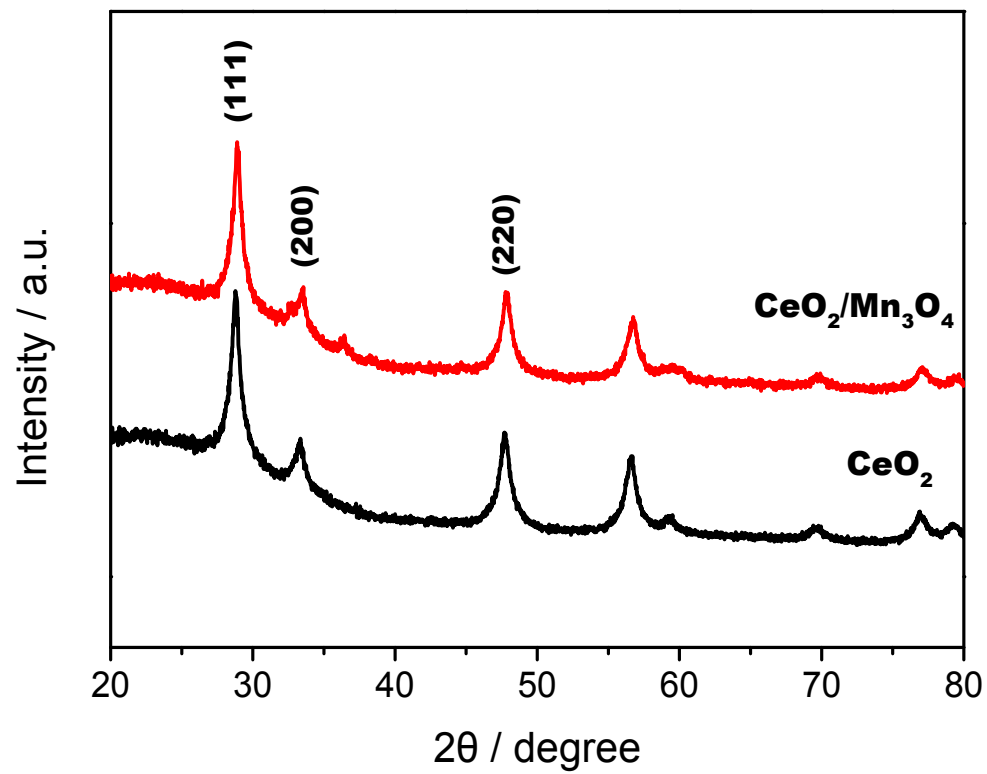

**Fig. S2.** XRD pattern of the  $\text{CeO}_2$  and  $\text{Mn}_3\text{O}_4/\text{CeO}_2$ .

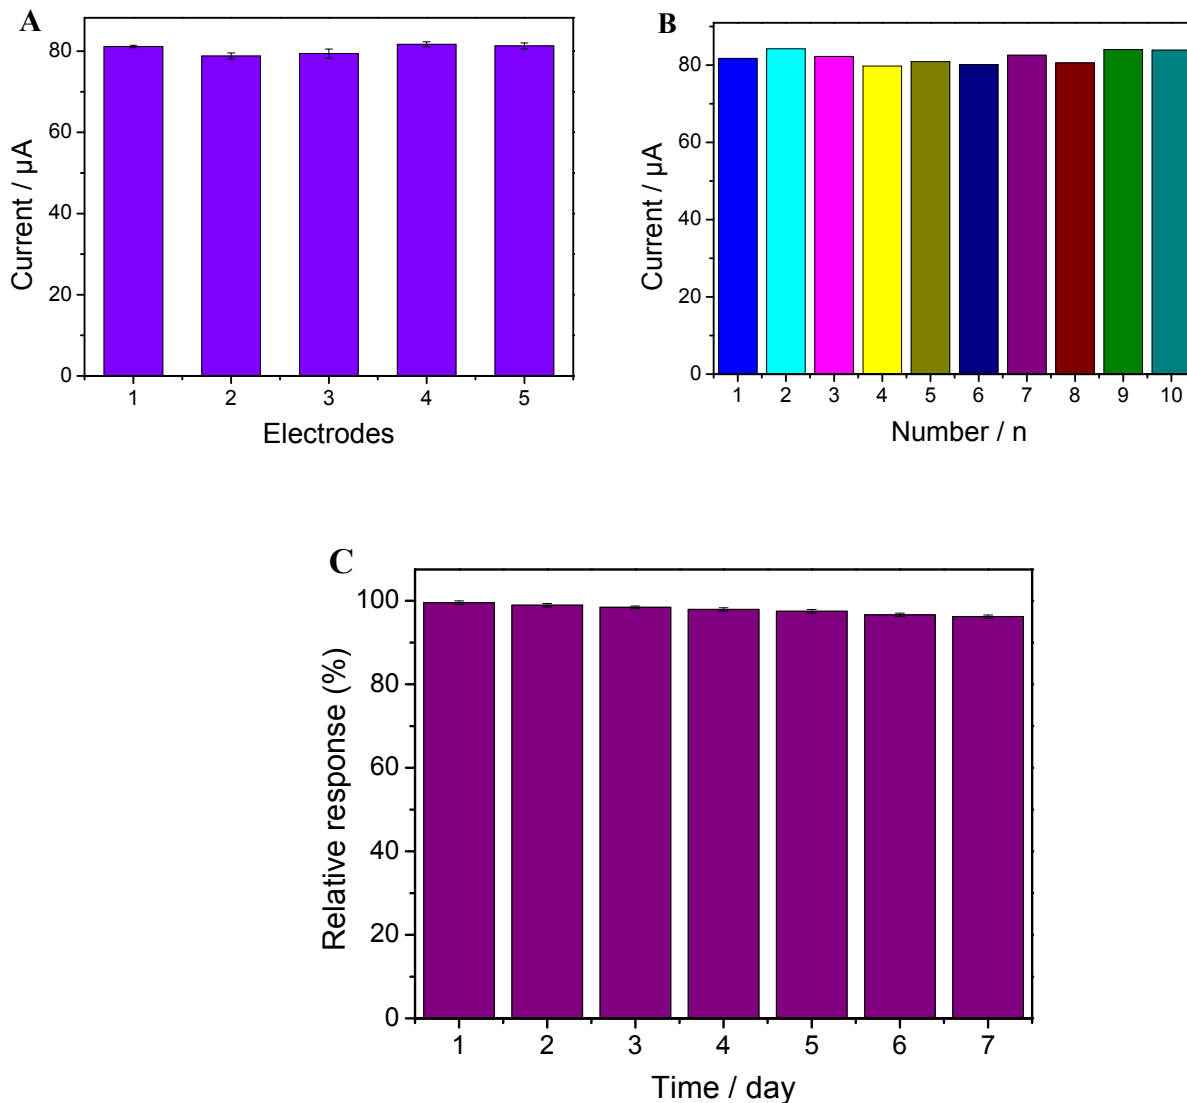

**Fig. S3.** (A) The current response of five different  $\text{Mn}_3\text{O}_4/\text{CeO}_2/\text{GCE}$  prepared under the same conditions in 0.1 M PBS (pH = 7.4) containing 1 mM  $\text{H}_2\text{O}_2$ . (B) The current response of 10 repeated amperometric measurements using the same  $\text{Mn}_3\text{O}_4/\text{CeO}_2/\text{GCE}$  in 0.1 M PBS (pH = 7.4) containing 1 mM  $\text{H}_2\text{O}_2$ . (C) Stability test of  $\text{Mn}_3\text{O}_4/\text{CeO}_2$  modified electrode.
